# Supplementary material for: Investigating the relationship between self-regulated learning and language proficiency among EFL students in Vietnam
Source: Research Square preprint supplement (doi:10.21203/rs.3.rs-3956946/v1), 2024-02-16
Supplement: Supplementary file 1 [file c55df7784a35f0fcd36c3332.docx]

**Appendix: QUESTIONNAIRE**

(adapted from Motivated Strategies for Learning Questionnaire, Pintrich et al, 1991)

Dear respondents,

The following questionnaire is designed to serve as a survey for my scientific research with the topic: "Investigating the relationship between self-regulated learning and language proficiency among EFL students at Hanoi Law University". The results of this survey will only be data for my research and not for any other purposes. I look forward to hearing from you. Thank you very much for your help!

**PART I: PERSONAL INFORMATION**

Gender: 🗌 Male 🗌 Female 🗌 Prefer not to say
Age: ……………………………….

Your major: ……………………….

Please choose the correct answer

For how long have you been learning English?

*🗌 1-3 years 🗌 3 -5 years 🗌 6 – 10 years 🗌 over 10 years*

How many hours do you learn English per day?

*🗌 30 minutes – 1 hour* *🗌* 1 - 2 hours *🗌 more than 2 hours*

What is your English level? (Please select the answer that best applies to your self-assessment or based on the result of international recognised certificates like IELTS)

*🗌 Beginner (equivalent to IELTS band score 0-2.5)*

*🗌 Elementary (equivalent to IELTS band score 3.0-3.5)*

*🗌 Intermediate (equivalent to IELTS band score 4.0-5.0)*

*🗌 Upper-intermediate (equivalent to IELTS band score 5.5-6.0)*

*🗌 Advanced (equivalent to IELTS band score 6.5-7.5)*

*🗌 Proficient (equivalent to IELTS band score 8.0-9.0)*

**PART II: SELF - REGULATED LANGUAGE LEARNING STRATEGIES**

The following items are based on your self - regulated language learning strategies. Your rating should be on a 5- point scale where **1= Strongly Disagree, 2 = Disagree, 3 = Neutral, 4 = Agree, 5 = Strongly Agree**. Please choose the correct number for each item and do not leave out any items.

| SELF-REGULATED LEARNING STRATEGIES | 1 | 2 | 3 | 4 | 5 |
| --- | --- | --- | --- | --- | --- |
| **META-COGNITIVE STRATEGIES** | | | | | |
| **I. Rehearsal** | | | | | |
| 1. I repeatedly say the material to myself while I study for a class. |  |  |  |  |  |
| 2. I read the course readings and my class notes numerous times while studying a course. |  |  |  |  |  |
| 3. I commit crucial terms to memory to help me remember the key concepts covered in a lesson. |  |  |  |  |  |
| 4. I compile lists of the key concepts for a course and commit the lists to memory. |  |  |  |  |  |
| **II. Elaboration** | | | | | |
| 1. I compile materials for a class from a variety of sources, including books, lectures, and discussions. |  |  |  |  |  |
| 2. Whenever possible, I make an effort to connect concepts from a course to those from other courses. |  |  |  |  |  |
| 3. I attempt to connect the readings for a class to what I already know. |  |  |  |  |  |
| 4. I jot down concise synopses of the key points from the readings and my class notes when studying for a course. |  |  |  |  |  |
| 5. I make an effort to comprehend the material in a class by drawing connections between the ideas presented in the lectures and the readings. |  |  |  |  |  |
| 6. In other class activities like lectures and discussions, I try to incorporate concepts from the course readings. |  |  |  |  |  |
| **III. Organization** | | | | | |
| 1. I make an overview of the readings for a course to help me keep my thoughts in order while studying them. |  |  |  |  |  |
| 2. I look over the texts and my class notes to identify the key ideas as I study for a course. |  |  |  |  |  |
| 3. I use basic tables, charts, and diagrams to facilitate me to arrange the course information. |  |  |  |  |  |
| 4. I review my class notes and create an overview of key ideas when studying for a course. |  |  |  |  |  |
| **IV. Critical thinking** | | | | | |
| 1. I frequently find myself debating what I read or hear in a course to determine whether it's credible. |  |  |  |  |  |
| 2. I attempt to determine whether there is strong supporting evidence for a theory, interpretation, or conclusion that is offered in class or in the readings. |  |  |  |  |  |
| 3. I attempt to build my own opinions about the course material by using it as a starting point. |  |  |  |  |  |
| 4. I make an effort to experiment with my own concepts in relation to what I am learning in a course. |  |  |  |  |  |
| 5. Whenever I read or hear an assertion or conclusion in a class, I think about possible alternatives. |  |  |  |  |  |
| **V. Metacognitive self-regulation** | | | | | |
| 1. I frequently overlook crucial information in class because I'm preoccupied with other things. (REVERSED) |  |  |  |  |  |
| 2. I make up questions as I read for a course to keep myself on task. |  |  |  |  |  |
| 3. When I'm uncertain about something I'm reading for a class, I go back and try to understand it. |  |  |  |  |  |
| 4. I read the content differently if the course texts are hard to understand. |  |  |  |  |  |
| 5. I often skim new course material to get a sense of how it is laid out before delving into it in-depth. |  |  |  |  |  |
| 6. To make sure I comprehend the stuff I have been learning in a session, I pose questions to myself. |  |  |  |  |  |
| 7. I make an effort to modify my study methods to meet the demands of the course and the teaching style of the instructor. |  |  |  |  |  |
| 8. Frequently, I discover that even though I have read the material for a class, I still don't understand it. (REVERSED) |  |  |  |  |  |
| 9. When I prepare for a course, I attempt to consider a topic and choose what I should learn from it instead of just reading it again. |  |  |  |  |  |
| 10. My goal in studying for a course is to identify the concepts that I don't fully grasp. |  |  |  |  |  |
| 11. I make goals for myself while I study for a class so that I can direct my activities throughout each study session. |  |  |  |  |  |
| 12. When taking notes in class, if I feel confused, I make sure to figure it out later. |  |  |  |  |  |
| **RESOURCE MANAGEMENT STRATEGIES** | | | | | |
| **I. Time and study environment management** | | | | | |
| 1. I typically study in an area where I can focus on my course work. |  |  |  |  |  |
| 2. I utilize my study time wisely for a course. |  |  |  |  |  |
| 3. I have trouble keeping to a study schedule. (REVERSED) |  |  |  |  |  |
| 4. I have a dedicated space where I study every day. |  |  |  |  |  |
| 5. I make sure to complete the readings and tasks for a course on a weekly basis. |  |  |  |  |  |
| 6. I frequently show up for a class. |  |  |  |  |  |
| 7. Frequently, I discover that I don't dedicate much time to a course due to other commitments. (REVERSED) |  |  |  |  |  |
| 8. Before an exam, I seldom ever have time to go over my readings or notes. (REVERSED) |  |  |  |  |  |
| **II. Effort Regulation** | | | | | |
| 1. When I study for this subject, I frequently give up before completing what I intended to because I'm too lazy or bored. (REVERSED) |  |  |  |  |  |
| 2. Even if I disagree with what we are doing in a class, I put a lot of effort into achieving well. |  |  |  |  |  |
| 3. I either give up on difficult coursework or focus just on the material that is simple. (REVERSED) |  |  |  |  |  |
| 4. I am able to work through course materials that are boring and uninteresting until I complete. |  |  |  |  |  |
| **III. Peer Learning** | | | | | |
| 1. I frequently try to convey the topics I'm learning for a class to a classmate or friend. |  |  |  |  |  |
| 2. I make an effort to collaborate with my classmates to do the homework for a class. |  |  |  |  |  |
| 3. I usually make time throughout my studies for a course to go over the content with a group of fellow classmates. |  |  |  |  |  |
| **IV. Help-seeking** | | | | | |
| 1. Even when I find it difficult to understand the topics covered in a class, I still make an effort to complete the assignments by myself. (REVERSED) |  |  |  |  |  |
| 2. I ask the teacher to explain any concepts I don't fully comprehend. |  |  |  |  |  |
| 3. I jot down concise synopses of the key points from the readings and my class notes when I'm studying for a course. |  |  |  |  |  |
| 4. I make an effort to find students in a class that I may approach for assistance if needed. |  |  |  |  |  |
